# Supplementary material for: Endovascular Occlusion of a Renal Arteriovenous Fistula with Renal Vein Aneurysm Formation for Rupture Prevention
Source: Hindawi journal article supplement (doi:10.1155/2019/8530641), 2019-10-31
Supplement: f2 [file 8530641.f2.pdf]

Supplement Figure 1

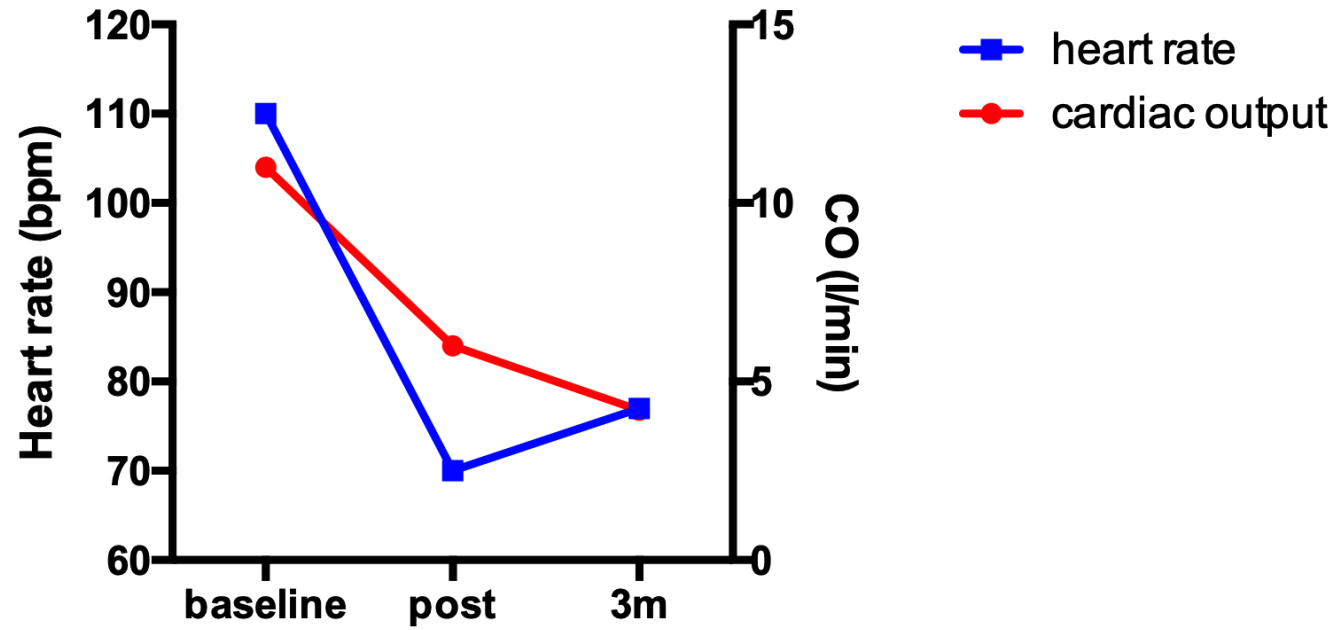

**Supplement Figure 1: Heart rate (bpm) and cardiac output (CO) over 3 time course of 3 months.** Elevated bpm and CO prior to treatment. Both parameters normalized two days (post) and 3 months (3m) after the occlusion of the RAVF utilizing Amplatzer Vascular Plug (AVP) Device II. Concordantly, the patient's physical capacity improved.
